# Supplementary material for: PET depolymerisation in supercritical ethanol catalysed by [Bmim][BF4]
Source: Royal Society of Chemistry journal article supplement (doi:10.1039/c4ra00262h), 2014-01-01
Supplement: c4ra00262h1.pdf [file c4ra00262h1.pdf]

# PET depolymerisation in supercritical ethanol catalysed by [Bmim][BF<sub>4</sub>]

Cátia Santos Nunes, Michael Jackson Vieira da Silva, Danielle Cristina da Silva,

Adonilson dos Reis Freitas, Fernanda Andréia Rosa, Adley Forti Rubira, Edvani Curti

Muniz\*

*Departamento de Química, Universidade Estadual de Maringá,*

*Av. Colombo, 5790, 87020-900, Maringá-PR, Brazil*

## Electronic Supplementary Information (ESI)

### 1. Figure S1

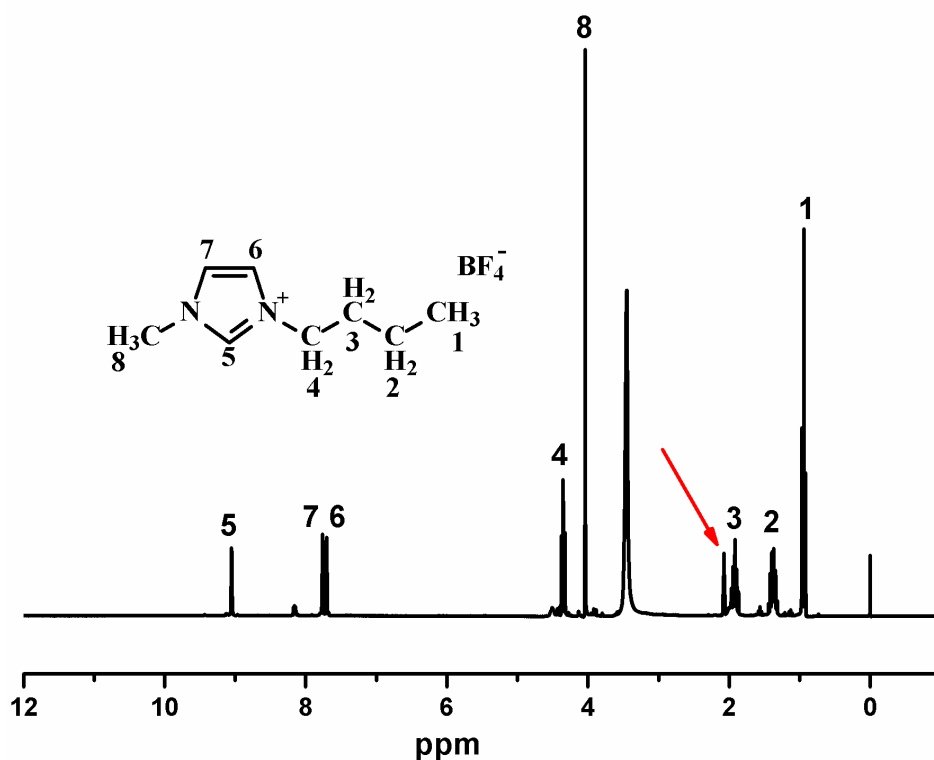

**Figure S1** - <sup>1</sup>H NMR spectra of recovering of the ionic liquid after the depolymerisation reaction, (run 8).

The  $^1\text{H}$  NMR spectrum of  $[\text{Bmim}][\text{BF}_4]$  recovered after the depolymerisation reaction (run 8) shows that there were no changes in  $[\text{Bmim}][\text{BF}_4]$  after be exposed to conditions of run 8. This indicates that ionic liquid remains stable and it is not decomposed during the reaction. The peak at  $\delta = 2.07$  ppm in Figure S1 indicated presence of small amount of DET in the recovered LI.

## 2. Figure S2

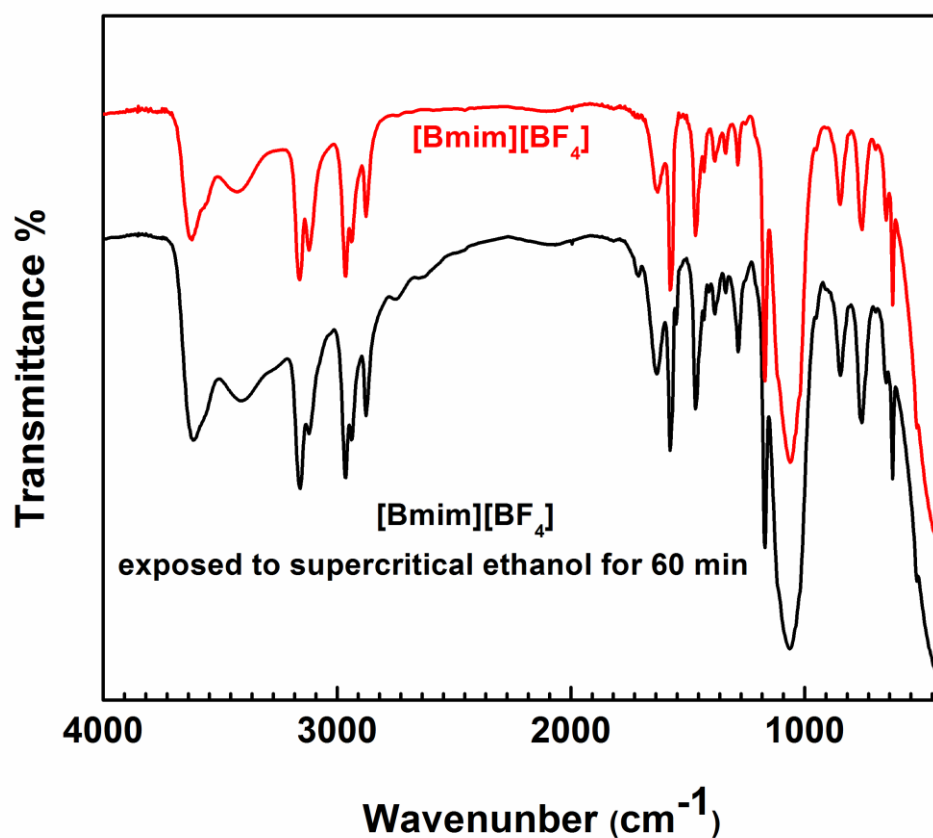

**Figure S2** - FTIR spectra to ionic liquid  $[\text{Bmim}][\text{BF}_4]$  in the EtOH room temperature (RT) and exposed to supercritical ethanol (EtOHsc) after 60 min.

### 3. Figure S3

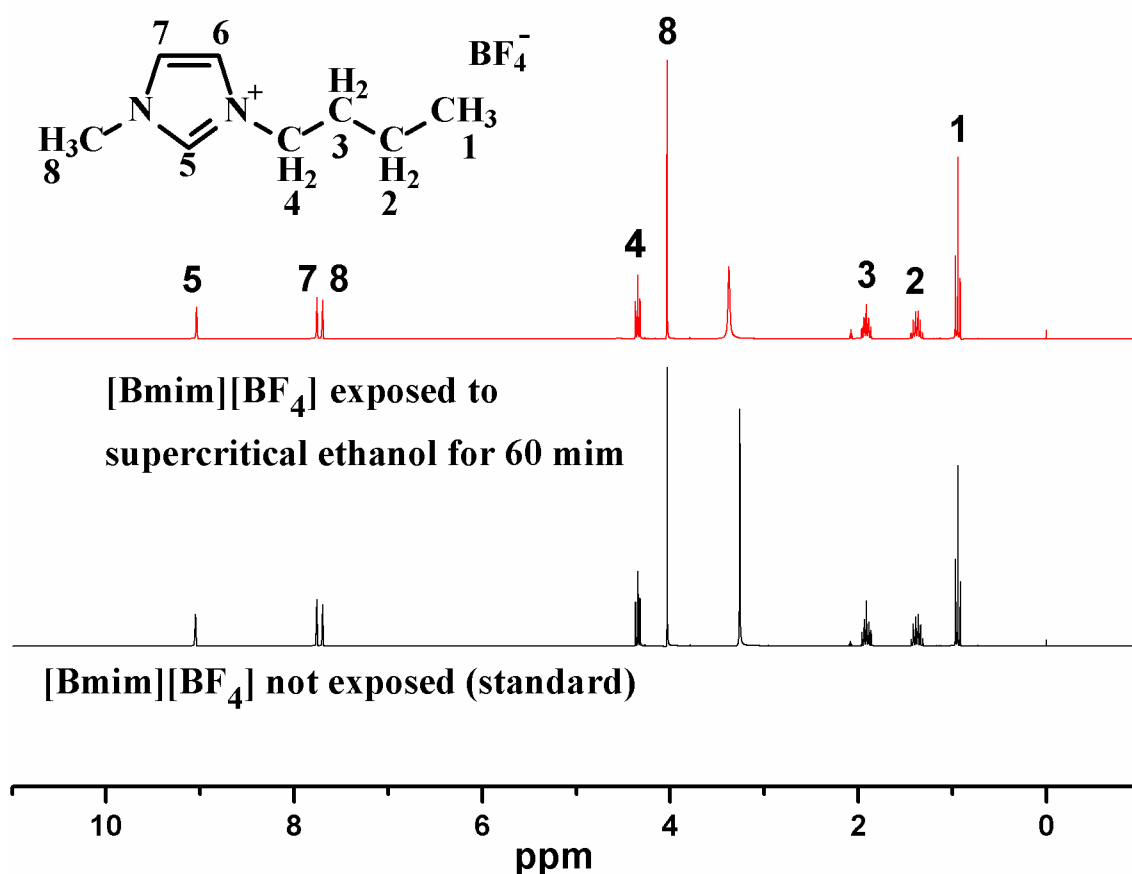

**Figure S3** - <sup>1</sup>H NMR spectra of ionic liquid [Bmim][BF<sub>4</sub>] exposed to supercritical ethanol for 60 min and [Bmim][BF<sub>4</sub>] not exposed.

Figure S2 and S3 show, respectively, the FTIR and <sup>1</sup>H NMR spectra of [Bmim][BF<sub>4</sub>] obtained before and after the ionic liquid (IL) be exposed to 115 atm and 255 °C for 60 min (but not in presence of PET). These spectra help the analysis of the stability of [Bmim][BF<sub>4</sub>] under supercritical ethanol (scEtOH) used for PET depolymerisation. Figures S2 and S3 indicated that [Bmim][BF<sub>4</sub>] was chemically stable when exposed to these T and P conditions for 60 min. Thus, no changes were observed in the [Bmim][BF<sub>4</sub>] demonstrating that the LI actuates as catalyst in the PET depolymerisation under scEtOH. Joining to Fig. S1 it can be pointed out that the [Bmim][BF<sub>4</sub>] can be recovered and reused in a further PET depolymerisation reaction.
